# Supplementary material for: Protocol for a cluster randomised controlled trial of the DAFNEplus (Dose Adjustment For Normal Eating) intervention compared with 5x1 DAFNE: a lifelong approach to promote effective self-management in adults with type 1 diabetes
Source: PubMed Central journal article supplement (PMC7813353; doi:10.1136/bmjopen-2020-040438), 2021-01-18
Supplement: bmjopen-2020-040438supp001.pdf [file bmjopen-2020-040438supp001.pdf]

### Supplementary material 1 – WHO Trial Registration Dataset

| Data Category                                 | Information                                                                                                                                                                                                                                                                                                                                                                                                                    |
|-----------------------------------------------|--------------------------------------------------------------------------------------------------------------------------------------------------------------------------------------------------------------------------------------------------------------------------------------------------------------------------------------------------------------------------------------------------------------------------------|
| Primary registry and trial identifying number | <a href="http://www.isrctn.com/ISR">http://www.isrctn.com/ISR</a> ISRCTN42908016                                                                                                                                                                                                                                                                                                                                               |
| Date of registration in primary registry      | 08/05/2018                                                                                                                                                                                                                                                                                                                                                                                                                     |
| Secondary identifying numbers                 | Sheffield CTRU: J13-003<br>Sponsor ID: STH20111<br>IRAS: 235621<br>Funding ref: RP-PG-0514-20013<br>REC: 18/SW/0100                                                                                                                                                                                                                                                                                                            |
| Source(s) of monetary or material support     | National Institute for Health Research (NIHR) (UK)                                                                                                                                                                                                                                                                                                                                                                             |
| Primary sponsor                               | Sheffield Teaching Hospitals NHS Foundation Trust                                                                                                                                                                                                                                                                                                                                                                              |
| Secondary sponsor(s)                          | N/A                                                                                                                                                                                                                                                                                                                                                                                                                            |
| Contact for public queries                    | Trial manager (Elaine Scott) 0114 222 5158 or <a href="mailto:dafneplus@sheffield.ac.uk">dafneplus@sheffield.ac.uk</a>                                                                                                                                                                                                                                                                                                         |
| Contact for scientific queries                | Trial manager (Elaine Scott) 0114 222 5158 or <a href="mailto:dafneplus@sheffield.ac.uk">dafneplus@sheffield.ac.uk</a>                                                                                                                                                                                                                                                                                                         |
| Public title                                  | DAFNE <sub>plus</sub> Cluster RCT                                                                                                                                                                                                                                                                                                                                                                                              |
| Scientific title                              | A cluster randomised controlled trial (RCT) of the DAFNE <sub>plus</sub> (Dose Adjustment for Normal Eating) intervention: A lifelong approach to promote effective self-management in adults with type 1 diabetes                                                                                                                                                                                                             |
| Countries of recruitment                      | England and Scotland                                                                                                                                                                                                                                                                                                                                                                                                           |
| Health condition(s) or problem(s) studied     | Type 1 diabetes                                                                                                                                                                                                                                                                                                                                                                                                                |
| Intervention(s)                               | DAFNE <sub>plus</sub> (Dose Adjustment for Normal Eating) intervention                                                                                                                                                                                                                                                                                                                                                         |
| Key inclusion and exclusion criteria          | <i>Inclusion criteria:</i> <ul style="list-style-type: none"> <li>• Adults (≥18 years);</li> <li>• Diagnosis of type 1 diabetes for at least 6 months, or post-honeymoon;</li> <li>• Prepared to undertake multiple daily injection (MDI) therapy;</li> <li>• Prepared to undertake frequent self-monitoring of blood glucose;</li> <li>• Confirms availability to attend all sessions as part of the intervention;</li> </ul> |

|                         |                                                                                                                                                                                                                                                                                                                                                                                                                                                                                                                                                                                                                                                                                                                                                                                                                                                                                                                                                                                                                                                                                                                                                                                                        |
|-------------------------|--------------------------------------------------------------------------------------------------------------------------------------------------------------------------------------------------------------------------------------------------------------------------------------------------------------------------------------------------------------------------------------------------------------------------------------------------------------------------------------------------------------------------------------------------------------------------------------------------------------------------------------------------------------------------------------------------------------------------------------------------------------------------------------------------------------------------------------------------------------------------------------------------------------------------------------------------------------------------------------------------------------------------------------------------------------------------------------------------------------------------------------------------------------------------------------------------------|
|                         | <ul style="list-style-type: none"> <li>Investigator has confidence that the patient is capable of adhering to all the trial protocol requirements.</li> </ul> <p><i>Exclusion criteria:</i></p> <ul style="list-style-type: none"> <li>Current use of continuous subcutaneous insulin infusion (CSII) pump therapy</li> <li>HbA1c &gt; 12%/108 mmol/mol (Investigators can use their judgement, informed by standard DAFNE guidelines and in agreement with the trial team, to include participants with HbA1c &gt;12%/108 mmol/mol).</li> <li>Serious diabetic complications (e.g. blindness, renal dialysis). (Investigators can use their clinical judgement, informed by standard DAFNE guidelines and in agreement with the trial team).</li> <li>Other serious co-morbidities e.g. psychosis, diagnosed eating disorder (Investigators can use their clinical judgement, informed by standard DAFNE guidelines and in agreement with the trial team).</li> <li>Previous participation in standard DAFNE course less than 5 years before proposed study enrolment date</li> <li>Unable to speak/hear/understand/read write in English</li> <li>Unable to give written informed consent</li> </ul> |
| Study type              | Multi-centre cluster randomised controlled trial with process evaluation and economic evaluation, comparing DAFNE <sub>plus</sub> to standard DAFNE for adults with type 1 diabetes.                                                                                                                                                                                                                                                                                                                                                                                                                                                                                                                                                                                                                                                                                                                                                                                                                                                                                                                                                                                                                   |
| Date of first enrolment | 01/09/2018                                                                                                                                                                                                                                                                                                                                                                                                                                                                                                                                                                                                                                                                                                                                                                                                                                                                                                                                                                                                                                                                                                                                                                                             |
| Target sample size      | 662 participants – 47 per centre.<br><br>Fourteen secondary care diabetes centres in the National Health Service in England and Scotland<br><br>In addition, we aim to recruit 20 DAFNE <sub>plus</sub> facilitators to take part in qualitative interviews for the process evaluation.                                                                                                                                                                                                                                                                                                                                                                                                                                                                                                                                                                                                                                                                                                                                                                                                                                                                                                                |
| Recruitment status      | Recruiting                                                                                                                                                                                                                                                                                                                                                                                                                                                                                                                                                                                                                                                                                                                                                                                                                                                                                                                                                                                                                                                                                                                                                                                             |
| Primary outcome(s)      | The primary biomedical outcome is glycaemic control, defined as the change in HbA1c at 12 months (using a centralised assay to ensure standardisation), in those entering the trial with HbA1c >7.5% (estimated at 75% of those currently undertaking DAFNE courses based on our research database).                                                                                                                                                                                                                                                                                                                                                                                                                                                                                                                                                                                                                                                                                                                                                                                                                                                                                                   |
| Key secondary outcomes  | <p>Secondary biomedical outcome:<br/>Number of participants achieving either an HbA1c &lt;7.5% (58 mmol/mol) or a decrease in HbA1c of ≥0.5% (≥5.5 mmol/mol) (using a centralised assay to ensure standardisation). These endpoints will be calculated using data collected at baseline and 12 months after the course.</p> <p>Other secondary biomedical outcomes will include:<br/>1. Severe hypoglycaemia, as defined by the American Diabetes Association, denotes severe</p>                                                                                                                                                                                                                                                                                                                                                                                                                                                                                                                                                                                                                                                                                                                      |

|  |                                                                                                                                                                                                                                                                                                                                                                                                                                                                                                                                                                                                                                                                                                                                                                                                                                                                                                                                                                                                                                                                                                                                                                                                                                                                                                                                                                                                                                                                                                                                                                                                                                                                                                                                                                                                                                                                                                                                                                                                                                                                                                                                                                                                                                                                                                                                                                                                                                                                                                                                                                                                                                                                                                                                                     |
|--|-----------------------------------------------------------------------------------------------------------------------------------------------------------------------------------------------------------------------------------------------------------------------------------------------------------------------------------------------------------------------------------------------------------------------------------------------------------------------------------------------------------------------------------------------------------------------------------------------------------------------------------------------------------------------------------------------------------------------------------------------------------------------------------------------------------------------------------------------------------------------------------------------------------------------------------------------------------------------------------------------------------------------------------------------------------------------------------------------------------------------------------------------------------------------------------------------------------------------------------------------------------------------------------------------------------------------------------------------------------------------------------------------------------------------------------------------------------------------------------------------------------------------------------------------------------------------------------------------------------------------------------------------------------------------------------------------------------------------------------------------------------------------------------------------------------------------------------------------------------------------------------------------------------------------------------------------------------------------------------------------------------------------------------------------------------------------------------------------------------------------------------------------------------------------------------------------------------------------------------------------------------------------------------------------------------------------------------------------------------------------------------------------------------------------------------------------------------------------------------------------------------------------------------------------------------------------------------------------------------------------------------------------------------------------------------------------------------------------------------------------------|
|  | <p>cognitive impairment requiring external assistance for recovery, both rates and proportion of those affected, measured at baseline at 12 months after the course</p> <ol style="list-style-type: none"> <li>2. Diabetic ketoacidosis, both rates and proportion of those affected, collected at baseline and 12 months after the course</li> <li>3. Weight, measured at baseline and 12 months after the course</li> <li>4. Body Mass Index, measured at baseline and 12 months after the course</li> <li>5. Blood pressure, measured at baseline and 12 months after the course</li> <li>6. Lipids, measured at baseline and 12 months after the course</li> <li>7. Albumin/ creatinine, measured at baseline and 12 months after the course</li> </ol> <p>The primary psychological outcome is the measurement at 12 months of the Audit-Dependent Diabetes Quality of Life Questionnaire (ADDQoL-15), a thirty-item measure of diabetes-specific quality of life.</p> <p>Psychological outcomes, measured at baseline, course completion, 3, 6 and 12 months:</p> <ol style="list-style-type: none"> <li>1. Dawn Impact of Diabetes Profile</li> <li>2. Problem Areas in Diabetes Scale</li> <li>3. Diabetes-specific positive well-being</li> <li>4. Hypoglycaemia Fear Survey</li> </ol> <p>Process measures:</p> <ol style="list-style-type: none"> <li>5. Diabetes Management Experiences Questionnaire</li> <li>6. Self-Regulation/Behavioural Regulation Questionnaire</li> <li>7. Diabetes Strengths &amp; Resilience Questionnaire</li> <li>8. Confidence in Diabetes Scale assesses beliefs about capabilities (self-efficacy).</li> <li>9. Diabetes Self-Care Behaviours</li> <li>10. Hypoglycaemia Confidence Scale</li> <li>11. Beliefs about consequences of engaging in DAFNE behaviours and weaving diabetes management into everyday routines.</li> <li>12. The System Usability Score</li> <li>13. Use and dose received of the DANFE<i>plus</i> programme assessed via logs of attendance at group and individual sessions, and use of the DANFE<i>plus</i> website</li> </ol> <p>Hypoglycaemia Awareness</p> <ol style="list-style-type: none"> <li>14. Hypoglycaemia awareness assessed via Gold score</li> </ol> <p>Health economic measures assessed at baseline, course completion, 6 and 12 months using:</p> <ol style="list-style-type: none"> <li>1. Health status – EQ-5D-5L</li> <li>2. Health and Self-Management in Diabetes HASMID</li> <li>3. Healthcare utilisation using a bespoke questionnaire</li> <li>4. Contact between professionals and course participants will also be recorded at each site using questionnaires and data from the DANFE<i>plus</i> website (in the intervention arm)</li> </ol> |
|--|-----------------------------------------------------------------------------------------------------------------------------------------------------------------------------------------------------------------------------------------------------------------------------------------------------------------------------------------------------------------------------------------------------------------------------------------------------------------------------------------------------------------------------------------------------------------------------------------------------------------------------------------------------------------------------------------------------------------------------------------------------------------------------------------------------------------------------------------------------------------------------------------------------------------------------------------------------------------------------------------------------------------------------------------------------------------------------------------------------------------------------------------------------------------------------------------------------------------------------------------------------------------------------------------------------------------------------------------------------------------------------------------------------------------------------------------------------------------------------------------------------------------------------------------------------------------------------------------------------------------------------------------------------------------------------------------------------------------------------------------------------------------------------------------------------------------------------------------------------------------------------------------------------------------------------------------------------------------------------------------------------------------------------------------------------------------------------------------------------------------------------------------------------------------------------------------------------------------------------------------------------------------------------------------------------------------------------------------------------------------------------------------------------------------------------------------------------------------------------------------------------------------------------------------------------------------------------------------------------------------------------------------------------------------------------------------------------------------------------------------------------|
